# Supplementary material
Source: Elsevier journal article supplement (https://www.sciencedirect.com/science/article/pii/S021391112100159X)
Supplement: mmc1 [file S021391112100159X:mmc1.doc]

# Appendix 1

**Table I**

Bivariate analysis with anthropometric and sociodemographic variables. Mean values, confidence interval (95%CI) and p values. t-test independent samples analysis (two-category variables) and ANOVA analysis (more than two categories variables). Statistically significant values are in bold.

|  |  | **Ca** | | **Cu** | | **Zn** | |
| --- | --- | --- | --- | --- | --- | --- | --- |
| **Variable** | **Categories** | **Mean (95%CI)** | **p** | **Mean (95%CI)** | **p** | **Mean (95%CI)** | **p** |
| Country of birth | Spain | 94045.0 (93796.9-94293.1) | 0.688 | 1609.7 (1593.7-1625.6) | **0.027** | 644.9 (638.4-651.6) | **0.003** |
|  | Other | 93869.1 (93156.5-94581.7) |  | 1673.0 (1617.8-1728.2) |  | 609.5 (588.5-630.6) |  |
| Season | Spring | 93369.9 (93506.9-94433.0) | 0.448 | 1606.3 (1575.1-1637.5) | 0.687 | 622.9 (611.1-634.9) | **0.002** |
|  | Summer | 94232.7 (93772.3-944693.5) |  | 1606.4 (1577.5-1635.3) |  | 651.8 (639.5-664.1) |  |
|  | Autumn | 93729.7 (93303.8-94155-7) |  | 1628.6 (1595.4-1661.8) |  | 650.7 (639.1-662.2) |  |
|  | Winter | 94170.0 (93636.6-94703.4) |  | 1620.4 (1590.6-1650.1) |  | 643.9 (628.8-659.1) |  |
| Residence | Urban | 93881.3 (93487.9-94274.7) | 0.184 | 1621.3 (1598.6-1644.0) | 0.462 | 665.8 (657.2-674.4) | **<0.001** |
|  | No urban | 94200.9 (93940.3-94461.6) |  | 1609.8 (1589.1-1630.5) |  | 618.8 (609.9-627.7) |  |
| Age_cat (years) | <25 | 94844.4 (93860.1-95828.6) | 0.077 | 1591.8 (1529.7-1653.9) | 0.276 | 619.5 (597.5-641.4) | 0.052 |
|  | 25-29 | 94295.1 (93930.7-94659.5) |  | 1611.9 (1584.9-1638.9) |  | 644.4 (632.5-656.4) |  |
|  | 30-34 | 93812.7 (93477.6-94147.8) |  | 1608.1 (1585.1-1631.0) |  | 648.5 (639.1-657.9) |  |
|  | ≥35 | 93778.2 (93037.9-94518.6) |  | 1647.6 (1609.9-1685.3) |  | 629.9 (616.2-643.6) |  |
| Physical activity before pregnancy | <1 hour/week | 94187.8 (93873.5-94502.1) | 0.176 | 1631.7 (1611.6-1651.9) | **0.016** | 641.6 (633.2-650.1) | 0.372 |
|  | 1-3 hours/week | 94010.4 (93564.2-94456.7) |  | 1601.5 (1571.7-1631.2) |  | 637.1 (625.2-648.9) |  |
|  | >4 hours/week | 93526.5 (92926.1-94127.0) |  | 1569.4 (1529.3-1609.5) |  | 652.1 (636.0-668.3) |  |
| Social class | No manual | 93885.1 (93538.9-94231.3) | 0.233 | 1588.0 (1565.8-1610.2) | **0.001** | 648.4 (639.6-657.2) | 0.052 |
|  | Manual | 94170.9 (93851.6-94490.1 ) |  | 1640.8 (1619.8-1661.9) |  | 635.9 (626.9-644.9) |  |
| Educational level | Primary | 94103.8 (93686.1-94521.6) | 0.187 | 1657.4 (1626.9-1687.9) | **0.004** | 621.9 (610.3-633.7) | **<0.001** |
|  | Secondary | 94241.8 (93853.5-94630.0) |  | 1616.2 (1592.3-1640.0) |  | 636.0 (625.8-646.2) |  |
|  | University | 93750.3 (93348.8-94151.9) |  | 1587.6 (1561.3-1613.9) |  | 660.8 (650.3-671.4) |  |
| Smoking habit | Never smoker | 93767.8 (93416.3-94119.2) | 0.308 | 1607.2 (1582.3-1632.1) | 0.667 | 646.2 (636.1-656.2) | 0.661 |
|  | Ex-smoker | 94226.1 (93651.3-94801.0) |  | 1628.4 (1597.5-1659.4) |  | 638.1 (624.7-651.6) |  |
|  | Quit at the beginning of pregnancy | 94335.2 (93818.3-94852.1) |  | 1609.3 (1573.3-1645.2) |  | 636.0 (621.0-651.1) |  |
|  | Smoker in pregnancy | 94046.8 (93560.0-94533.6) |  | 1601.8 (1565.7-1637.9) |  | 640.1 (625.7-654.5) |  |
| Alcohol consumption_cat | ≤5 g/day | 94057.9 (93819.5-94296.3) | 0.396 | 1615.6 (1600.1-1631.2) | 0.928 | 642.4 (636.0-648.8) | 0.256 |
|  | >5 g/day | 93078.5 (90613.5-95543.5) |  | 1622.5 (1483.4-1761.5) |  | 607.3 (553.4-661.2) |  |
| Alcohol consumption (gr/day) |  | -136.1 (-358.41-84.10)* | 0.230 | 2.24 (-12.26-16.74)* | 0.762 | -3.26 (-9.11-2.60)* | 0.276 |
| Parity | Primipara | 94183.7 (93890.1-94477.3) | 0.160 | 1566.6 (1547.8-1585.4) | **<0.001** | 646.4 (638.1-654.6) | 0.148 |
|  | Multipara | 93845.9 (93466.8-94224.9) |  | 1672.9 (1648.6-1697.3) |  | 637.1 (627.4-646-8) |  |
| BMI (kg/m2) | Underweight | 93486.3 (92349.9-94622.7) | 0.094 | 1530.3 (1455.3-1605.3) | **<0.001** | 637.8 (616.3-659.4) | 0.790 |
|  | Normal weight | 93979.3 (93708.8-94249.8) |  | 1585.2 (1567.5-1602.9) |  | 640.9 (633.5-648.4) |  |
|  | Overweight | 94606.4 (93976.7-95236.1) |  | 1689.4 (1652.3-1726.4) |  | 648.8 (633.8-663.8) |  |
|  | Obese | 93506.8 (92643.7-94369.9) |  | 1770.3 (1714.2-1826.3) |  | 638.1 (609.3-666.8) |  |
| Marital situation | Live with father | 94025.1 (93787.8-94262.4) | 0.681 | 1614.8 (1599.4-1630.3) | 0.991 | 642.0 (635.7-648-4) | 0.867 |
|  | No live with father | 94468.5 (92947.9-95989.1) |  | 1615.6 (1481.2-1750.0) |  | 646.9 (579.8-713.9) |  |
| Occupational status | Employed | 94152.2 (93746.3-94558.1) | 0.526 | 1604.8 (1587.4-1622.1) | **0.021** | 645.4 (638.1-652.7) | **0.048** |
|  | Unemployed | 93993.2 (93714.5-94271.9) |  | 1648.5 (1616.3-1680.7) |  | 629.9 (617.5-642.4) |  |

* Beta coefficient (95%CI).

|  |  | **Se** | | **Fe** | | **Mg** | |
| --- | --- | --- | --- | --- | --- | --- | --- |
| **Variable** | **Categories** | **Mean (95%CI)** | **p** | **Mean (95%CI)** | **p** | **Mean (95%CI)** | **p** |
| Country of birth | Spain | 79.76 (79.20-80.31) | **0.017** | 1117.1 (1098.5-1135.7) | 0.248 | 17029.2 (16947.3-17111.1) | 0.820 |
|  | Other | 77.40 (75.78-79.02) |  | 1078.5 (1012.5-1144.6) |  | 17057.1 (16822.1-17292.0) |  |
| Season | Spring | 80.34 (79.35-81.34) | **<0.001** | 1108.8 (1072.0-1145.6) | 0.746 | 17016.8 (16890.8-17142.8) | 0.952 |
|  | Summer | 78.24 (77.32-79.17) |  | 1103.9 (1068.9-1138.9) |  | 17054.9 (16911.1-17198.7) |  |
|  | Autumn | 77.67 (76.58-78.76) |  | 1130.8 (1094.8-1166.9) |  | 17063.7 (16815.2-17312.2) |  |
|  | Winter | 82.21 (81.02-83.40) |  | 1114.4 (1078.9-1149.8) |  | 17007.2 (16868.3-17146.0) |  |
| Residence | Urban | 77.71 (76.89-78.54) | **<0.001** | 1113.8 (1088.9-1138.6) | 0.930 | 16924.2 (16680.9-17167.6) | 0.375 |
|  | No urban | 81.46 (80.83-82.10) |  | 1115.4 (1089.3-1141.5) |  | 17043.6 (16961.9-17125.2) |  |
| Age_cat (years) | <25 | 77.62 (75.88-79.35) | 0.192 | 1099.9 (1020.2-1179.6) | 0.740 | 16891.4 (16646.7-17136.1) | 0.060 |
|  | 25-29 | 79.32 (78.45-80.19) |  | 1128.0 (1094.9-1161.2) |  | 17029.0 (16897.1-17160.9) |  |
|  | 30-34 | 79.84 (79.05-80.63) |  | 1106.1 (1079.8-1132.4) |  | 16984.2 (16866.6-17101.8) |  |
|  | ≥35 | 80.07 (78.53-81.61) |  | 1113.2 (1073.7-1152.8) |  | 17269.5 (17053.9-17485.0) |  |
| Physical activity before pregnancy | <1 hour/week | 79.436(78.69-80.03) | **0.005** | 1096.2 (1072.9-1119.6) | **0.041** | 16994.0 (16896.3-17091.7) | 0.458 |
|  | 1-3 hours/week | 80.98 (79.85-82.11) |  | 1138.6 (1104.9-1172.2) |  | 17091.4 (16936.4-17246.3) |  |
|  | >4 hours/week | 78.21 (76.87-79.54) |  | 1151.4 (1100.3-1202.6) |  | 17111.8 (16907.9-17315.6) |  |
| Social class | No manual | 79.68 (78.87-80.50) | 0.670 | 1122.9 (1097.7-1148.1) | 0.336 | 17145.2 (17023.1-17267.3) | **0.016** |
|  | Manual | 79.45 (78.77-80.13) |  | 1105.3 (1079.9-1130.8) |  | 16952.6 (16853.5-17051.8) |  |
| Educational level | Primary | 79.34 (78.34-80.33) | 0.846 | 1102.2 (1064.1-1140.3) | **0.034** | 16995.6 (16855.3-17135.9) | 0.320 |
|  | Secondary | 79.50 (78.72-80.27) |  | 1092.1 (1064.5-1119.6) |  | 17000.1 (16889.1-17111.1) |  |
|  | University | 79.74 (78.75-80.72) |  | 1144.0 (1114.3-1173.4) |  | 17135.2 (16969.8-17300.7) |  |
| Smoking habit | Never smoker | 79.63 (78.80-80.46) | 0.939 | 1118.0 (1089.9-1146.1) | 0.795 | 16952.1 (16824.4-17079.8) | 0.217 |
|  | Ex-smoker | 79.62 (78.37-80.87) |  | 1102.2 (1066.9-1137.4) |  | 17097.5 (16927.9-17267.0) |  |
|  | Quit at the beginning of pregnancy | 80.03 (78.89-81.17) |  | 1131.4 (1084.3-1178.5) |  | 16977.9 (16815.6-17140.0) |  |
|  | Smoker in pregnancy | 79.86 (78.66-81.07) |  | 1118.7 (1074.6-1162.8) |  | 17147.2 (16978.1-17316.3) |  |
| Alcohol consumption_cat | ≤5 g/day | 79.63 (79.10-80.17) | 0.560 | 1113.1 (1095.0-1131.3) | 0.169 | 17026.7 (16948.6-17104.8) | 0.189 |
|  | >5 g/day | 78.12 (73.56-82.69) |  | 1233.9 (1017.5-1450.5) |  | 17448.2 (16835.4-18060.9) |  |
| Alcohol consumption (gr/day) |  | 0.20 (-0.30-0.70) | 0.790 | 12.12 (-4.81-29.0) | 0.160 | 37.54 (-21.26-96.35) | 0.210 |
| Parity | Primipara | 79.57 (78.81-80.22) | 0.994 | 1124.3 (1100.5-1148.2) | 0.212 | 17109.2 (17012.9-17205.6) | **0.033** |
|  | Multipara | 79.56 (78.70-80.42) |  | 1101.5 (1074.4-1128.6) |  | 16938.5 (16814.0-17062.9) |  |
| Gestation week |  |  |  |  |  |  |  |
| Body mass index (kg/m2) | Underweight | 80.76 (77.35-84.18) | 0.248 | 1202.2 (1121.3-1283.1) | **<0.001** | 17164.9 (16792.5-17537.3) | 0.876 |
|  | Normal weight | 79.42 (79.42-80.04) |  | 1130.6 (1109.5-1151.7) |  | 17030.2 (16937.9-17122.5) |  |
|  | Overweight | 80.43 (79.22-81.64) |  | 1078.7 (1035.8-1121.7) |  | 17042.6 (16865.8-17219.5) |  |
|  | Obese | 78.41 (76.38-80.43) |  | 988.4 (920.0-1056.8) |  | 16971.2 (16668.3-17274.1) |  |
| Marital situation | Live with father | 79.56 (79.02-80.09) | 0.805 | 1114.1 (1096.2-1132.0) | 0.876 | 17030.2 (16951.9-17108.4) | 0.672 |
|  | No live with father | 80.16 (75.71-84.61) |  | 1101.3 (867.2-1335.4) |  | 17154.3 (16703.7-17604.8) |  |
| Occupational status | Employed | 79.63 (79.01-80.25) | 0.559 | 1077.9 (1039.0-1116.7) | **0.041** | 17057.5 (16967.5-17147.8) | 0.272 |
|  | Unemployed | 79.28 (78.30-80.26) |  | 1123.3 (1103.1-1143.5) |  | 16962.2 (16813.6-17110.7) |  |

* Beta coefficient (95%CI)

**Table II**

Bivariate analysis with dietary variables. Mean values, confidence interval (95%CI) and p value (t-test independent samples). Statistically significant values are in bold.

|  |  | **Ca** | | **Cu** | | **Zn** | |
| --- | --- | --- | --- | --- | --- | --- | --- |
| **Variable** | **Categories** | **Mean (95%CI)** | **p** | **Mean (95%CI)** | **p** | **Mean (95%CI)** | **p** |
| Calories (KJ/day) | ≤2000 | 93946.3 (93527.5-94365.1) | 0.488 | 1624.1 (1599.5-1648.7) | 0.376 | 649.2 (638.9-659.6) | 0.065 |
|  | >2000 | 94116.5 (93838.3-94394.6) |  | 1609.9 (1590.0-1629.8) |  | 637.1 (629.2-645.1) |  |
| Proteins (g/day) | ≤99.50 | 93923.5 (93523.9-94322.9) | 0.439 | 1603.8 (1576.9-1630.7) | 0.253 | 646.9 (636.5-657.3) | 0.250 |
|  | >99.50 | 94117.8 (93823.1-94412.6) |  | 1622.5 (1603.7-1641.3) |  | 639.2 (631.3-647.2) |  |
| Fat (g/day) | ≤89.5 | 94034.1 (93692.5-94375.7) | 0.901 | 1628.5 (1608.0-1649.0) | 0.059 | 647.1 (638.8-655.4) | 0.073 |
|  | >89.5 | 94064.5 (93751.1-94377.9) |  | 1598.4 (1574.9-1621.9) |  | 635.4 (625.7-645.1) |  |
| Carbohydrates (g/day) | ≤250.50 | 94033.6 (93679.9-94387.3) | 0.903 | 1624.7 (1603.3-1646.1) | 0.212 | 643.7 (634.9-652.5) | 0.577 |
|  | >250.50 | 94063.0 (93758.0-94368.0) |  | 1604.9 (1582.7-1627.2) |  | 640.1 (631.0-649.1) |  |
| Dairy products (g/day) | ≤455 | 93853.2 (93529.1-94177.4) | 0.086 | 1612.1 (1590.5-1633.7) | 0.622 | 645.4 (636.4-654.5) | 0.255 |
|  | >455 | 94269.2 (93921.7-94616.7) |  | 1619.9 (1597.8-1641.9) |  | 638.1 (629.3-646.9) |  |
| Red meat (g/day) | ≤53.50 | 93870.9 (93488.8-94252.9) | 0.323 | 1602.7 (1578.1-1627.4) | 0.263 | 651.9 (639.6-664.3) | **0.039** |
|  | >53.50 | 94128.1 (93829.7-94426.4) |  | 1621.7 (1602.2-1641.2) |  | 637.6 (630.3-644.8) |  |
| White meat (g/day) | ≤30.45 | 93694.2 (93343.9-94044.4) | **0.010** | 1607.4 (1582.8-1632.0) | 0.355 | 648.8 (639.4-658.2) | 0.064 |
|  | >30.45 | 94321.3 (94000.6-94641.9) |  | 1622.1 (1602.4-1641.9) |  | 636.8 (628.2-645.3) |  |
| Fish (g/day) | ≤71 | 94103.9 (93782.0-94425.9) | 0.600 | 1618.7 (1598.1-1639.2) | 0.678 | 638.9 (630.8-647.1) | 0.290 |
|  | >71 | 93976.3 (93625.4-94327.3) |  | 1612.1 (1588.6-1635.5) |  | 645.8 (635.9-655.8) |  |
| Cereals/pasta (g/day) | ≤90.5 | 93839.6 (93495.2-94183.9) | 0.047 | 1615.5 (1594.9-1636.2) | 0.978 | 648.6 (640.3-656.9) | **0.018** |
|  | >90.5 | 94324.5 (94017.0-94631.9) |  | 1615.9 (1592.6-1639.3) |  | 633.3 (623.6-642.9) |  |
| Legumes(g/day) | ≤50 | 94161.0 (93815.3-94506.8) | 0.398 | 1610.7 (1587.5-1633.9) | 0.570 | 639.3 (629.5-649.1) | 0.438 |
|  | >50 | 93955.5 (93630.1-94280.9) |  | 1619.7 (1598.9-1640.5) |  | 644.3 (636.1-652.6) |  |
| Potatoes (g/day) | ≤61.5 | 93978.3 (93293.8-94662.9) | 0.359 | 1603.9 (1572.1-1635.7) | 0.162 | 670.6 (658.2-682.9) | 0.508 |
|  | >61.5 | 93590.7 (93096.4-94084.9) |  | 1636.9 (1603.6-1670.2) |  | 676.4 (664.5-688.3) |  |
| Bread (g/day) | ≤42 | 94291.9 (93989.7-94594.2) | 0.065 | 1630.4 (1607.7-1653.2) | 0.089 | 621.8 (612.4-631.2) | **<0.001** |
|  | >42 | 93844.7 (93491.3-94198.1) |  | 1603.6 (1582.5-1624.6) |  | 659.4 (651.1-667.7) |  |
| Supplement Vit B6 | No | 93881.7 (93585.9-94177.5) | 0.061 | 1615.2 (1596.7-1633.7) | 0.946 | 650.4 (643.0-657.7) | **<0.001** |
|  | Yes | 94367.9 (93994.7-94741.1) |  | 1614.0 (1586.6-1641.5) |  | 623.7 (611.7-635.7) |  |
| Supplement Vit B12 | No | 94016.1 (93518.6-94513.6) | 0.940 | 1615.7 (1585.0-1646.5) | 0.942 | 657.1 (645.3-668.9) | **0.004** |
|  | Yes | 94036.2 (93772.4-94300.1) |  | 1614.5 (1596.8-1632.2) |  | 636.4 (628.9-643.8) |  |
| Supplement Vit D | No | 93860.9 (93574.7-94147.3) | **0.014** | 1614.7 (1596.8-1632.5) | 0.969 | 648.9 (641.9-655.9) | **<0.001** |
|  | Yes | 94543.9 (94167.7-94920.3) |  | 1615.4 (1585.4-1645.3) |  | 621.8 (607.9-635.6) |  |
| Supplement Ca | No | 93875.7 (93577.5-94173.9) | **0.040** | 1614.9 (1596.6-1633.3) | 0.978 | 650.0 (642.8-657.2) | **<0.001** |
|  | Yes | 94419 (94073.7-94764.3) |  | 1614.5 (1586.5-1642.5) |  | 622.5 (609.9-635.0) |  |
| Supplement Fe | No | 93903.6 (93588.7-94218.6) | 0.135 | 1618.7 (1599.4-1638.1) | 0.511 | 653.2 (645.6-660.7) | **<0.001** |
|  | Yes | 94279.4 (93951.4-94607.5) |  | 1607.9 (1582.8-1633.1) |  | 622.3 (611.2-633.3) |  |
| Supplement Mg | No | 93899.8 (93601.4-94198.2) | 0.091 | 1617.9 (1599.4-1636.4) | 0.542 | 650.7 (643.4-657.9) | **<0.001** |
|  | Yes | 94343.9 (93989.5-94698.2) |  | 1607.4 (1579.8-1635.1) |  | 621.9 (609.7-634.2) |  |
| Supplement Zn | No | 93887.8 (93586.5-94189.2) | 0.065 | 1617.0 (1598.5-1635.6) | 0.661 | 650.9 (643.7-658.2) | **<0.001** |
|  | Yes | 94372.5 (94033.4-94711.6) |  | 1609.5 (1582.1-1636.9) |  | 621.3 (609.1-633.5) |  |
|  | >30 | 94171.7 (93878.9-94464.4) |  | 1629.6 (1608.6-1650.6) |  | 642.3 (633.9-650.8) |  |
|  |  |  | |  | |  | |

|  |  | **Mean (95%CI)** | **p** | **Mean (95%CI)** | **p** | **Mean (95%CI)** | **p** |
| --- | --- | --- | --- | --- | --- | --- | --- |
| **Variable** | **Categories** | **Se** |  | **Fe** |  | **Mg** |  |
| Calories (KJ/day) | ≤2000 | 79.13 (78.23-80.03) | 0.137 | 1096.8 (1069.7-1123.9) | 0.110 | 17119.1 (16977.9-17260.3) | 0.156 |
|  | >2000 | 79.93 (79.30-80.60) |  | 1126.7 (1102.6-1150.8) |  | 16996.7 (16904.0-17089.3) |  |
| Proteins (g/day) | ≤99.50 | 79.07 (78.16-79.98) | 0.128 | 1107.0 (1077.4-1136.7) | 0.538 | 17095.1 (16964.0-17226.2) | 0.315 |
|  | >99.50 | 79.93 (79.27-80.59) |  | 1118.8 (1096.0-1141.6) |  | 17007.8 (16912.7-17102.9) |  |
| Fat (g/day) | ≤89.5 | 79.31 (78.56-80.06) | 0.178 | 1102.3 (1079.2-1125.4) | 0.123 | 17117.3 (17004.8-17229.9) | 0.063 |
|  | >89.5 | 80.03 (79.30-80.77) |  | 1131.0 (1102.3-1159.7) |  | 16969.2 (16863.3-17075.2) |  |
| Carbohydrates (g/day) | ≤250.50 | 79.68 (78.92-80.44) | 0.798 | 1100.3 (1077.0-1123.5) | 0.094 | 17119.3 (17011.7-17226.9) | **0.030** |
|  | >250.50 | 79.54 (78.80-80.28) |  | 1131.4 (1103.1-1159.6) |  | 16948.4 (16837.4-17059.3) |  |
| Dairy products (g/day) | ≤455 | 78.73 (78.99-80..47) | 0.662 | 1118.5 (1093.7-1143.4) | 0.636 | 17015.6 (16909.6-17121.6) | 0.649 |
|  | >455 | 79.49 (78.72-80.26) |  | 1109.8 (1083.5-1136.2) |  | 17051.5 (16937.9-17165.0) |  |
| Red meat (g/day) | ≤53.50 | 80.13 (79.15-81.11) | 0.198 | 1131.3 (1099.4-1163.2) | 0.213 | 17094.8 (16962.1-17227.6) | 0.325 |
|  | >53.50 | 79.38 (78.75-80.01) |  | 1106.7 (1084.8-1128.6) |  | 17008.7 (16914.1-17103.3) |  |
| White meat (g/day) | ≤30.45 | 79.24 (78.42-80.07) | 0.226 | 1107.7 81081.0-1134.4) | 0.519 | 17053.9 (16928.9-17178.8) | 0.699 |
|  | >30.45 | 79.91 (79.21-80.60) |  | 1119.7 (1095.2-1144-2) |  | 17021.9 (16923.3-17120.5) |  |
| Fish (g/day) | ≤71 | 79.08 (78.37-79.79) | **0.028** | 1114.9 (1090.8-1139.0) | 0.957 | 17035.9 (16938.5-17133.3) | 0.935 |
|  | >71 | 80.28 (79.48-81.08) |  | 1113.9 (1086.6-1141.3) |  | 17029.4 (16902.4-17156.3) |  |
| Cereals/pasta (g/day) | ≤90.5 | 79.22 (78.49-79.95) | 0.088 | 1107.3 (1083.8-1130.8) | 0.366 | 17087.5 (16969.1-17205.9) | 0.233 |
|  | >90.5 | 80.15 (79.38-80.92) |  | 1124.1 (1095.9-1152.3) |  | 16992.4 (16889.9-17094.9) |  |
| Legumes(g/day) | ≤50 | 80.11 (79.36-80.86) | 0.100 | 1116.8 (1089.4-1144.2) | 0.821 | 17118.9 (17017.1-17220.7) | **0.020** |
|  | >50 | 79.22 (78.47-79.97) |  | 1112.6 (1088.6-1136.7) |  | -16935.9 (16818.2-17053.6) |  |
| Potatoes (g/day) | ≤61.5 | 77.35 (76.19-78.51) | 0.654 | 1114.8 (1080.2-1149.5) | 0.972 | - | - |
|  | >61.5 | 76.97 (75.74-78.19) |  | 1113.9 (1076.6-1151.3) |  | - |  |
| Bread (g/day) | ≤42 | 81.55 (80.88-82.23) | **<0.001** | 1113.8 (1085.9-1141.7) | 0.949 | 17074.4 (16984.9-17163.8) | 0.063 |
|  | >42 | 78.02 (77.24-78.79) |  | 1115.0 (1091.4-1138.7) |  | 16902.5 (16748.7-17056.2) |  |
| Supplement Vit B6 | No | 78.20 (77.55-78.84) | **<0.001** | 1113.2 (1091.9-1134.5) | 0.898 | 16969.8 (16844.2-17095.4) | 0.157 |
|  | Yes | 82.67 (81.83-83.51) |  | 1115.7 (1082.8-1148.7) |  | 17081.8 (16985.5-17178.1) |  |
| Supplement Vit B12 | No | 77.51 (76.58-78.54) | **<0.001** | 1151.4 (1118.8-1183.9) | **0.011** | 17029.8 (16744.3-17315.3) | 0.982 |
|  | Yes | 80.35 (79.74-80.96) |  | 1099.6 (1078.3-1120.9) |  | 17032.7 (16952.7-17112.7) |  |
| Supplement Vit D | No | 78.43 (77.81-79.06) | **<0.001** | 1114.2 (1093.6-1134.8) | 0.961 | 16971.2 (16858.1-17084.3) | 0.104 |
|  | Yes | 83.00 (82.12-83.88) |  | 1113.2 (1076.9-1149.5) |  | 17099.1 (16995.0-17203.3) |  |
| Supplement Ca | No | 78.30 (77.64-78.94) | **<0.001** | 1114.2 (1093.2-1135.1) | 0.970 | 16955.7 (16832.4-17078.9) | 0.075 |
|  | Yes | 82.77 (81.97-83.57) |  | 1113.4 (1079.0-1147.8) |  | 17097.9 (17001.0-17194.9) |  |
| Supplement Fe | No | 78.27 (77.59-78.94) | **<0.001** | 1115.8 (1093.9-1137.5) | 0.780 | 16944.9 (16808.4-17081.5) | 0.074 |
|  | Yes | 82.04 (81.24-82.83) |  | 1110.4 (1078.9-1141.8) |  | 17089.1 (16997.1-17181.0) |  |
| Supplement Mg | No | 78.32 (77.66-78.98) | **<0.001** | 1112.5 (1091.4-1133.5) | 0.801 | 16969.4 (16844.3-17094.4) | 0.152 |
|  | Yes | 82.55 (81.77-83.33) |  | 1117.5 (1083.5-1151.6) |  | 17082.8 (16986.1-17179.4) |  |
| Supplement Zn | No | 78.31 (77.65-78.97) | **<0.001** | 1112.1 (1091.1-1133.2) | 0.759 | 16969.8 (16844.2-17095.4) | 0.157 |
|  | Yes | 82.58 (81.80-83.35) |  | 1118.3 (1084.3-1152.2) |  | 17081.8 (16985.5-17178.1) |  |

**Table III**

Bivariate analysis with anthropometric and sociodemographic variables for each study cohort .Mean values, confidence interval (95%CI) and p values. t-test independent samples analysis (two-category variables) and ANOVA analysis (more than two categories variables). Statistically significant values are in bold.

| **Cohort: Gipuzkoa** |  | **Ca** | | **Cu** | | **Zn** | | **Se** | |
| --- | --- | --- | --- | --- | --- | --- | --- | --- | --- |
| **Variable** | **Categories** | **Mean (95%CI)** | **p** | **Mean (95%CI)** | **p** | **Mean (95%CI)** | **p** | **Mean (95%CI)** | **p** |
| Age (years) | <25 | 94056.3 (93431.5-94681.1) | **0.042** | 1695.79 (1551.42-1840.17) | 0.383 | 661.18 (593.06-729.30) | 0.127 | 73.70 (67.27-80.12) | 0.581 |
|  | 25-29 | 97000.4 (92646.3-101354.5) |  | 1594.24 (1552.52-1635.96) |  | 684.75 (669.15-700.35) |  | 76.88 (75.42-78.34) |  |
|  | 30-34 | 93427.9 (92895.5-93960.3) |  | 1626.80 (1593.69-1659.92) |  | 675.04 (662.99-687.10) |  | 77.39 (76.25-78.54) |  |
|  | ≥35 | 93628.0 (92370.3-94885.8) |  | 1635.81 (1581.87-1689.75) |  | 655.25 (635.31-675.18) |  | 77.00 (74.72-79.28) |  |
| Season | Spring | 93425.1 (92769.4-94080.8) | 0.350 | 1606.87 (1545.90-1667.84) | 0.895 | 659.09 (640.62-677.557) | 0.276 | 76.16 (74.22-78.09) | **<0.001** |
|  | Summer | 94230.3 (93186.9-95273.7) |  | 1613.51 (1572.20-1654.82) |  | 682.29 (666.50-698.07) |  | 75.88 (74.51-77.24) |  |
|  | Autumn | 93351.8 (92561.6-94142.0) |  | 1627.87 (1585.22-1670.52) |  | 671.67 (656.73-686.62) |  | 75.87 (74.43-77.32) |  |
|  | Winter | 94073.1 (93233.5-94912.8) |  | 1629.71 (1584.91-1674.51) |  | 679.62 (658.52-700.71) |  | 80.97 (78.93-83.01) |  |
| Residence | Urban | 93004.7 (93373.9-94226.9) | 0.659 | 1621.04 (1597.05-1645.03) | 0.951 | 673.79 (664.88-682.72) | 0.882 | 77.16 (76.28-78.04) | 0.439 |
|  | No urban | 93800.5 (91743.0-95108.5) |  | 1623.99 (1539.34-1708.64) |  | 671.11 (636.52-705.70) |  | 75.81 (72.55-79.06) |  |
| Social class | No manual | 93468.9 (92938.6-93999.4) | 0.120 | 1586.15 (1554.82-1617.47) | **0.001** | 670.22 (658.99-681.44) | 0.332 | 77.63 (76.43-78.84) | 0.126 |
|  | Manual | 94120.4 (93481.1-94759.7) |  | 1666.42 (1633.55-1699.229) |  | 678.77 (665.60-691.94) |  | 76.31 (75.21-77.42) |  |
| Educational level | Primary | 94086.9 (92990.4-95183.5) | 0.680 | 1675.57 (1616.28-1734.86) | **0.031** | 666.69 (645.79-687.59) | 0.739 | 73.80 (71.87-75.73) | **0.001** |
|  | Secondary | 93841.8 (93126.9-94556.7) |  | 1639.56 (1604.48-1674.65) |  | 677.35 (663.17-691.53) |  | 76.29 (75.06-77.51) |  |
|  | University | 93575.6 (93012.6-94138.6) |  | 1591.97 (1557.28-1626.66) |  | 673.04 (660.60-685.47) |  | 78.44 (77.14-779.74) |  |
| Smoking habit | Never smoker | 93270.4 (92722.9-93817.8) | 0.195 | 1590.19 (1553.80-1626.58) | 0.195 | 671.86 (658.83-684.89) | 0.440 | 77.50 (76.33-78.68) | 0.788 |
|  | Smoker in pregnancy | 93899.1 (92728.1-95070.1) |  | 1611.98 (1552.86-1671.10) |  | 673.84 (649.37-698.31) |  | 76.10 (73.18-79.03) |  |
|  | Ex-smoker | 94354.3 (93386.9-95321.7) |  | 1636.55 (1591.62-1681.47) |  | 670.65 (653.86-687.44) |  | 77.53 (75.79-79.27) |  |
|  | Quit at the beginning of pregnancy | 93631.6 (92619.4-94643.8) |  | 1659.69 (1607.61-1711.78) |  | 693.66 (670.73-716.59) |  | 77.40 (75.13-79.67) |  |
| Alcohol consumption cat | ≤5 g/day | 93788.2 (93372.4-94203.9) | 0.389 | 1622.56 (1599.32-1645.80) | 0.230 | 673.47 (664.86-682.09) | 0.653 | 77.19 (76.34-78.04) | 0.225 |
|  | >5 g/day | 91535.9 883269.4-99802.3) |  | 1447.05 (1239.21-1654.89) |  | 696.64 (593.33-799.95) |  | 70.72 (64.35-77.08) |  |
| Alcohol consumption (g/day) |  | -144.07 (-737.85-449.71)* | 0.634 | -20.97 (-54.13-12.19)* | 0.215 | 6.72 (-5.18-18.63)* | 0.268 | -0.19 (-1.40-1.0.)* | 0.757 |
| Parity | Primipara | 93866.1 (93370.1-94362.2) | 0.537 | 1559.50 (1531.89-1587.11) | **<0.001** | 676.52 (665.21-687.78) | 0.507 | 77.04 (76.07-78.01) | 0.946 |
|  | Multipara | 93608.3 (92933.7-94282.9) |  | 1692.30 (1655.89-1728.70) |  | 670.75 (657.74-683.76) |  | 77.10 (75.67-78.53) |  |
| Body mass index (kg/m2) | Underweight | 92722.4 (90677.8-94766.9) | 0.062 | 1547.84 (1439.71-1655.97) | **0.002** | 646.03 (616.90-675.15) | 0.108 | 79.73 (72.91-86.56) | **0.042** |
|  | Normal weight | 93633.9 (93185.8-94082.1) |  | 1600.21 (1574.25-1626.17) |  | 672.29 (662.25-682.33) |  | 77.31 (76.37-78.25) |  |
|  | Overweight | 94914.7 (93643.0-96185.5) |  | 1694.00 (1631.44-1756.56) |  | 693.26 (671.44-715.07) |  | 76.89 (75.00-78.79) |  |
|  | Obese | 92756.3 (91140.5-94372.2) |  | 1740.72 (1640.80-1840.64) |  | 653.54 (619.30-687.78) |  | 72.15 (68.00-76.31) |  |
| Marital situation | Live with father | 93737.6 (93327.2-94148.1) | 0.519 | 1620.79 (1597.76-1643.83) | 0.637 | 673.32 (664.78-681.86) | 0.144 | 77.08 (76.24-77.92) | 0.853 |
|  | No live with father | 95414.1 (90731.2-100097) |  | 1551.77 (1099.42-2004.13) |  | 760.22 (540.83-979.61) |  | 76.09 (58.67-93.51) |  |
| Country of birth | Spain | 93719.2 (93301.2-94137.2) | 0.510 | 1611.54 (1588.34-1634.74) | **<0.001** | 674.11 (665.43-682.80) | 0.714 | 77.22 (76.37-78.08) | 0.087 |
|  | Other | 94390.6 (92377.9-96403.2) |  | 1814.48 (1695.80-1933.16) |  | 666.07 (617.92-714.22) |  | 73.64 (69.37-77.92) |  |

* Beta coefficient (95%CI).

| **Cohort: Gipuzkoa** |  | **Fe** | |
| --- | --- | --- | --- |
| **Variable** | **Categories** | **Mean (95%CI)** | **p** |
| Age (years) | <25 | 1067.98 (908.33-1227.62) | 0.578 |
|  | 25-29 | 1135.35 (1085.45-1185.25) |  |
|  | 30-34 | 1098.12 (1062.99-1133.24) |  |
|  | ≥35 | 1121.64 (1066.22-1177.05) |  |
| Season | Spring | 1087.58 (1029.91-1145.26) | 0.493 |
|  | Summer | 1109.64 (1062.15-1157.14) |  |
|  | Autumn | 1106.14 (1060.13-1152.16) |  |
|  | Winter | 1147.24 (1093.23-1201.25) |  |
| Residence | Urban | 1116.70 (1090.35-1143.05) | 0.532 |
|  | No urban | 1083.89 (981.75-1186.02) |  |
| Social class | No manual | 1117.53 (1086.16-1148.89) | 0.682 |
|  | Manual | 1106.91 (1065.35-1148.47) |  |
| Educational level | Primary | 1079.13 (1008.71-1149.56) | 0.162 |
|  | Secondary | 1091.93 (1051.74-1132.13) |  |
|  | University | 1136.53 (1100.35-1172.71) |  |
| Smoking habit | Never smoker | 1122.22 (1084.34-1160.10) | 0.427 |
|  | Smoker in pregnancy | 1071.37 (1002.41-1140.33) |  |
|  | Ex-smoker | 1111.51 (1063.94-1159.09) |  |
|  | Quit at the beginning of pregnancy | 1158.76 (1079.28-1238.24) |  |
| Alcohol consumption cat | ≤5 g/day | 1112.80 (1087.36-1138.25) | 0.501 |
|  | >5 g/day | 1347.71 (368.08-2327.34) |  |
| Alcohol consumption (g/day) |  | 15.45 (-21.23-52.11)* | 0.409 |
| Parity | Primipara | 1111.53 (1078.76-1144.32) | 0.901 |
|  | Multipara | 1114.74 (1075.58-1153.91) |  |
| Body mass index (kg/m2) | Underweight | 1128.05 (1029.47-1226.58) | 0.084 |
|  | Normal weight | 1124.86 (1095.80-1153.93) |  |
|  | Overweight | 1097.26 (1029.75-1164.77) |  |
|  | Obese | 973.43 (863.85-1083.01) |  |
| Marital situation | Live with father | 1112.47 (1087.18-1137.75) | 0.602 |
|  | No live with father | 1196.12 (710.40-1681.85) |  |
| Country of birth | Spain | 1115.35 (1089.67-1141.03) | 0.391 |
|  | Other | 1061.35 (927.18-1195.52) |  |

*Beta coefficient (95%CI).

| **Cohort: Valencia** |  | **Ca** | | **Cu** | | **Zn** | | **Se** | |
| --- | --- | --- | --- | --- | --- | --- | --- | --- | --- |
| **Variable** | **Categories** | **Mean (95%CI)** | **p** | **Mean (95%CI)** | **p** | **Mean (95%CI)** | **p** | **Mean (95%CI)** | **p** |
| Age (years) | <25 | 94497.5 (94078.8-94916.3) | **0.042** | 1567.39 (1498.14-1605.96) | **0.041** | 609.89 (587.46-632.33) | 0.487 | 78.54 (76.97-80.11) | **<0.001** |
|  | 25-29 | 94337.1 (93604.3-95069.8) |  | 1626.93 (1591.54-1662.32) |  | 612.48 (596.08-628.88) |  | 81.39 (80.43-82.35) |  |
|  | 30-34 | 94246.5 (93864.8-94628.3) |  | 1586.89 (1555.37-1618.41) |  | 620.74 (606.79-634.69) |  | 82.61 (81.63-83.59) |  |
|  | ≥35 | 93952.9 (93274.1-94631.9) |  | 1661.43 (1608.56-1714.30) |  | 600.79 (583.77-617.81) |  | 83.67 (81.88-85.46) |  |
| Season | Spring | 93905.5 (93353.5-94457.5) | 0.207 | 1605.97 (1570.18-1641.75) | 0.809 | 604.53 (589.76-619.29) | 0.483 | 82.48 (81.44-83.51) | **0.006** |
|  | Summer | 94544.7 (94118.8-94970.6) |  | 1598.78 (1558.05-1639.51) |  | 619.31 (601.34-637.29) |  | 80.78 (79.64-81.92) |  |
|  | Autumn | 94456.6 (93947.8-94965.3) |  | 1629.82 (1576.28-1683.37) |  | 616.69 (600.27-633.10) |  | 80.69 (79.19-82.19) |  |
|  | Winter | 94018.1 (93541.4-94494.7) |  | 1611.90 (1571.80-1651.99) |  | 620.04 (599.86-640.22) |  | 83.34 (82.03-84.65) |  |
| Residence | Urban | 94625.9 (93784.9-95466.9) | 0.381 | 1623.73 (1550.50-1696.96) | 0.677 | 595.85 (570.12-621.58) | 0.190 | 82.81 (80.73-84.88) | 0.365 |
|  | No urban | 94253.2 (93997.7-94508.8) |  | 1608.82 (1587.40-1630.23) |  | 615.64 (606.47-624.80) |  | 81.85 (81.21-82.49) |  |
| Social class | No manual | 94426.7 (94034.5-94818.9) | 0.382 | 1590.44 (1559.50-1621.38) | 0.123 | 621.44 (608.08-634.79) | 0.140 | 82.37 (81.42-83.32) | 0.234 |
|  | Manual | 94205.8 (93893.2-94518.5) |  | 1623.20 (1595.78-1650.62) |  | 608.31 (596.99-619.63) |  | 81.62 (80.83-82.42) |  |
| Educational level | Primary | 94110.7 (93719.1-94502.3) |  | 1650.09 (1614.32-16685.87) | **0.025** | 605.72 (592.32-619.13) | **0.003** | 81.58 (80.56-82.60) | 0.729 |
|  | Secondary | 94558.9 (94154.4-94963.4) |  | 1597.61 (1565.20-1630.02) |  | 604.65 (591.42-617.87) |  | 82.04 (81.14-82.94) |  |
|  | University | 94078.5 (93608.1-94549) |  | 1579.30 (1540.30-1618.48) |  | 639.46 (620.36-658.56) |  | 82.19 (80.83-83.55) |  |
| Smoking habit | Never smoker | 94314.9 (93894.5-94735.3) | 0.294 | 1626.05 (1592.34-1659.75) | 0.386 | 619.41 (604.61-634.20) | 0.195 | 81.98 (80.88-83.08) | 0.268 |
|  | Smoker in pregnancy | 94116.1 (93646.0-94586.3) |  | 1597.04 (1551.46-1642.62) |  | 624.92 (607.60-642.24) |  | 81.27 (80.12-82.42) |  |
|  | Ex-smoker | 94076.7 (93535.6-94617.9) |  | 1618.97 (1576.78-1661.15) |  | 603.08 (583.13-623.03) |  | 82.95 (81.68-84.22) |  |
|  | Quit at the beginning of pregnancy | 94773.4 (94221.6-95325.2) |  | 1577.91 (1529.73-1626.09) |  | 601.80 (584.73-618.87) |  | 81.40 (80.09-82.70) |  |
| Alcohol consumption cat | ≤5 g/day | 94312.5 (94066.5-94558.5) | 0.543 | 1609.10 (1588.24-1629.96) | 0.329 | 614.83 (606.10-623.57) | 0.202 | 81.95 (81.33-82.57) | 0.733 |
|  | >5 g/day | 93695 (90847.5-96543.6) |  | 1692.63 (1519.00-1866.26) |  | 567.67 (515.58-619.75) |  | 81.09 (75.99-86.19) |  |
| Alcohol consumption (g/day) |  | -160.33 (-346.31-25.66)* | 0.091 | 8.90 (-6.81-24.62)* | 0.266 | -3.37 (-9.96-3.21)* | 0.315 | 0.07 (-0.39-0.54)* | 0.750 |
| Parity | Primipara | 94480.2 (94152.4-94807.9) | 0.104 | 1573.15 (1547.41-1598.90) | **<0.001** | 620.72 (609.46-631.97) | 0.084 | 81.93 (81.11-82.75) | 0.988 |
|  | Multipara | 94073.7 (93706.8-94440.7) |  | 1654.24 (1621.74-1686.73) |  | 605.43 (592.07-618.80) |  | 81.94 (81.03-82.84) |  |
| BMI (kg/m2) | Underweight | 94191.5 (93000.6-95382.4) | 0.744 | 1514.07 (1403.04-1625.09) | **<0.001** | 630.03 (596.54-663.53) | 0.536 | 81.72 (79.12-84.31) | 0.249 |
|  | Normal weight | 94342.7 (94051.6-94633.7) |  | 1569.45 (1545.54-1593.35) |  | 610.28 (600.05-620.50) |  | 81.64 (80.89-82.39) |  |
|  | Overweight | 94364.2 (93829.1-94899.3) |  | 1685.74 (1640.69-1730.80) |  | 616.01 (597.33-634.69) |  | 83.22 (81.80-84.63) |  |
|  | Obese | 93875.9 (92842.1-94909.7) |  | 1784.81 (1715.37-1854.25) |  | 630.05 (589.58-670.53) |  | 81.48 (79.63-83.34) |  |
| Marital situation | Live with father | 94300.1 (94052.9-94547.3) | 0.875 | 1609.11 (1588.35-1629.87) | 0.722 | 613.75 (605.04-622.46) | 0.881 | 81.94 (81.33-82.56) | 0.852 |
|  | No live with father | 94153.3 (92321.9-95984.7) |  | 1636.90 (1477.79-1796.00) |  | 618.54 (546.49-690.59) |  | 81.51 (76.83-86.20) |  |
| Country of birth | Spain | 94378.7 (94117.4-94639.9) | 0.073 | 1607.78 (1585.84-1629.72) | 0.631 | 616.75 (607.45-626.06) | 0.069 | 82.36 (81.71-83.01) | **<0.001** |
|  | Other | 93686.2 (92997.4-94375.1) |  | 1623.40 (1563.93-1682.87) |  | 591.98 (569.62-614.34) |  | 78.72 (77.16-80.28) |  |

*Beta coefficient (95%CI).

|  |  | **Fe** | | **Mg** | |
| --- | --- | --- | --- | --- | --- |
| **Cohort: Valencia** | **Categories** | **Mean (95%CI)** | **p** | **Mean (95%CI)** | **p** |
| Age (years) | <25 | 1107.42 (1014.77-1200.07) | 0.969 | 16891.45 (16646.75-17136.16) | 0.060 |
|  | 25-29 | 1121.85 (1077.11-1166.59) |  | 17029.03 (16897.12-17160.94) |  |
|  | 30-34 | 1115.19 (1075.46-1154.93) |  | 16984.22 (16866.58-17101.86) |  |
|  | ≥35 | 1103.40 (1046.29-1160.51) |  | 17269.51 (17053.99-17485.03) |  |
| Season | Spring | 1119.58 (1072.24-1166.92) | 0.159 | 17063.75 (16815.25-17312.26) | 0.952 |
|  | Summer | 1097.69 (1045.57-1149.81) |  | 16994.01 (16896.28-17091.74) |  |
|  | Autumn | 1172.35 (1114.29-1230.42) |  | 17091.37 (16936.41-17246.34) |  |
|  | Winter | 1084.53 (1037.95-1131.12) |  | 17054.93 (16911.10-17198.76) |  |
| Residence | Urban | 1087.00 (1012.23-1161.76) | 0.491 | 16924.24 (16680.86-17167.63) | 0.375 |
|  | No urban | 1117.54 (1090.45-1144.63) |  | 17043.61 (16961.97-17125.25) |  |
| Social class | No manual | 1129.98 (1088.57-1171.39) | 0.329 | 16995.58 (16855.29-17135.87) | **0.016** |
|  | Manual | 1104.26 (1072.05-1136.47) |  | 17000.08 (16889.07-17111.10) |  |
| Educational level | Primary | 1111.55 (1065.93-1157.18) | 0.126 | 17135.25 (16969.79-17300.71) | 0.320 |
|  | Secondary | 1092.22 (1054.28-1130.15) |  | 17032.64 (16926.05-17139.24) |  |
|  | University | 1158.18 (1105.84-1210.52) |  | 17032.23 (16919.88-17144.59) |  |
| Smoking habit | Never smoker | 1113.35 (1071.44-1155.26) | 0.648 | 17097.47 (16927.91-17267.03) | 0.217 |
|  | Smoker in pregnancy | 1140.98 (1084.69-1197.27) |  | 16977.94 (16815.63-17140.25) |  |
|  | Ex-smoker | 1091.21 (1038.30-1144.13) |  | 17109.25 (17012.90-17205.61) |  |
|  | Quit at the beginning of pregnancy | 1114.64 (1055.64-1173.64) |  | 16938.48 (16814.04-17062.91) |  |
| Alcohol consumption cat | ≤5 g/day | 1113.48 (1087.67-1139.30) | 0.478 | 17026.70 (16948.61-17104.79) | 0.189 |
|  | >5 g/day | 1188.50 (1000.95-1376.05) |  | 17448.19 (16835.42-18060.96) |  |
| Alcohol consumption (g/day) |  | 11.33 (-8.07-30.73)* | 0.252 | 37.54 (-21.26-96.35)* | 0.210 |
| Parity | Primipara | 1136.38 (1101.84-1170.91) | 0.067 | 17164.92 (16792.54-17537.30) | **0.031** |
|  | Multipara | 1088.72 (1051.08-1126.35) |  | 17030.22 (16937.92-17122.50) |  |
| Body mass index (kg/m2) | Underweight | 1270.63 (1143.85-1397.41) | **<0.001** | 17042.65 (16865.78-17219.51) | 0.876 |
|  | Normal weight | 1136.66 (1105.94-1167.37) |  | 16971.23 (16668.33-17174.12) |  |
|  | Overweight | 1064.19 (1008.15-1120.23) |  | 17030.19 (16951.93-17108.44) |  |
|  | Obese | 995.74 (907.04-1084.43) |  | 17154.28 (16703.72-17604.85) |  |
| Marital situation | Live with father | 1115.72 (1090.27-1141.17) | 0.634 | 17057.48 (16967.13-17147.83) | 0.672 |
|  | No live with father | 1069.69 (762.73-1376.66) |  | 17018.77 (16835.27-17202.27) |  |
| Country of birth | Spain | 1118.92 (1091.93-1145.91) | 0.394 | 17029.18 (16947.28-17111.08) | 0.820 |
|  | Other | 1084.60 (1006.99-1162.21) |  | 17057.07 (16822.14-17292.00 |  |

*Beta coefficient (95%CI).

**Table IV**

Bivariate analysis with dietary variables. Mean values, confidence interval (95%CI) and p value of t-test independent samples. Statistically significant values are in bold.

| **Gipuzkoa** |  | **Ca** | | **Cu** | | **Zn** | | **Se** | |
| --- | --- | --- | --- | --- | --- | --- | --- | --- | --- |
|  |  | **Mean (95%CI)** | **p** | **Mean (95%CI)** | **p** | **Mean (95%CI)** | **p** | **Mean (95%CI)** | **p** |
| **Variable** | **Categories** |  |  |  |  |  |  |  |  |
| Calories (KJ/day) | ≤2000 | 93762.4 (93139.9-94384.9) | 0.956 | 1628.38 (1595.87-1660.76) | 0.536 | 676.37 (664.12-688.63) | 0.510 | 77.41 (76.14-78.68) | 0.516 |
|  | >2000 | 93785.5 (93245.9-94325.1) |  | 1613.71 (1580.61-1646.81) |  | 670.62 (658.65-682.59) |  | 76.85 (75.76-77.95) |  |
| Proteins (g/day) | ≤99.50 | 93697.5 (93104.9-94290.1) | 0.749 | 1610.93 (1574.37-1647.49) | 0.426 | 679.43 (666.18-692.68) | 0.236 | 77.05 (75.75-78.34) | 0.834 |
|  | >99.50 | 93833.8 (93255.8-94411.7) |  | 1629.81 (1600.06-1659.57) |  | 669.02 (657.79-680.25) |  | 77.23 (76.11-78.34) |  |
| Fat (g/day) | ≤89.5 | 93804.8 (93297.5-94312.2) | 0.808 | 1624.85 (1597.42-1652.29) | 0.634 | 672.17 (661.93-682.41) | 0.591 | 77.50 (76.46-78.54) | 0.183 |
|  | >89.5 | 93689.4 (92291.2-94387.5) |  | 1612.24 (1568.94-1655.54) |  | 677.38 (661.65-693.10) |  | 76.21 (74.82-77.61) |  |
| Carbohydrates (g/day) | ≤250.50 | 93823.6 (93237.2-94409.9) | 0.774 | 1626.13 (1595.34-1656-91) | 0.628 | 672.73 (660.95-684.50) | 0.800 | 77.27 (76.09-78.44) | 0.734 |
|  | >250.50 | 93700.3 (93142.0-94258.6) |  | 1614.50 (1579.39-1649.61) |  | 674.98 (662.72-687.24) |  | 76.97 (75.79-78.15) |  |
| Dairy products (g/day) | ≤455 | 93497.6 (92963.8-94031.4) | 0.140 | 1611.21 (1578.69-1643.73) | 0.328 | 672.12 (660.35-683.93) | 0.696 | 77.13 (75.98-78.28) | 0.966 |
|  | >455 | 94124.2 (93470.9-94777.5) |  | 1634.46 (1601.93-1666.99) |  | 675.58 (663.12-688.04) |  | 77.17 (75.92-78.72) |  |
| Red meat (g/day) | ≤53.50 | 93455.3 (92855.9-94054.7) | 0.270 | 1581.09 (1547.83-1614.35) | 0.012 | 680.44 (665.15-695.73) | 0.261 | 78.37 (76.87-79.86) | 0.038 |
|  | >53.50 | 93943.2 (93393.2-94493.3) |  | 1643.14 (1612.51-1673.78) |  | 670.10 (659.76-680.44) |  | 76.49 (75.48-77.51) |  |
| White meat (g/day) | ≤30.45 | 93441.1 (92903.9-93978.2) | 0.095 | 1618.59 (1585.00-1652.19) | 0.802 | 676.41 (664.78-688.04) | 0.506 | 77.49 (76.33-78.66) | 0.399 |
|  | >30.45 | 94146.2 (93505.6-94786.8) |  | 1624.52 (1592.83-1656.21) |  | 670.60 (657.90-683.30) |  | 76.77 (75.54-77.99) |  |
| Fish (g/day) | ≤71 | 93955.0 (93341.9-94568.1) | 0.370 | 1628.79 (1596.54-1661.03) | 0.516 | 676.76 (665.80-687.71) | 0.461 | 76.32 (75.12-77.52) | 0.046 |
|  | >71 | 93576.2 (93022.4-94129.9) |  | 1613.45 (1580.09-1646.80) |  | 670.32 (656.96-683.67) |  | 78.04 (76.85-79.23) |  |
| Cereals/pasta (g/day) | ≤90.5 | 93644.3 (93132.9-94155.8) | 0.320 | 1614.37 (1587.88-1640.87) | 0.332 | 672.97 (662.74-683.20) | 0.803 | 77.14 (76.14-78.15) | 0.991 |
|  | >90.5 | 94114.8 (93438.9-94790.8) |  | 1639.96 (1592.79-1687.14) |  | 675.41 (659.67-691.15) |  | 77.15 (75.60-78.71) |  |
| Legumes(g/day) | ≤50 | 93845.9 (93800.9-94610.8) | 0.799 | 1622.21 (1583.33-1661.10) | 0.960 | 680.75 (665.95-695.55) | 0.212 | 77.46 (76.03-78.88) | 0.597 |
|  | >50 | 93733.8 (93245.7-94221.9 |  | 1620.97 (1592.08-1649.86) |  | 669.47 (658.99-679.95) |  | 76.98 (75.93-78.03) |  |
| Potatoes (g/day) | ≤61.5 | 93978.3 (93293.8-94662.9) | 0.359 | 1603.91 )1572.08-1635.75) | 0.162 | 670.61 (658.22-686.99) | 0.508 | 77.35 (76.19-78.51) | 0.654 |
|  | >61.5 | 93590.7 (93096.4-94084.9) |  | 1636.90 (1603.57-1670.24) |  | 676.38 (664.47-688.30) |  | 76.97 (75.74-78.19) |  |
| Bread (g/day) | ≤42 | 94211.4 (92802.2-95620.6) | 0.437 | 1724.11 (1650.12-1798.11) | 0.001 | 695.20 (666.63-723.76) | 0.059 | 79.78 (77.28-82.27) | **0.021** |
|  | >42 | 93711.8 (93281.4-94142.6) |  | 1606.82 (1582.74-1630.89) |  | 670.51 (661.62-679.41) |  | 76.78 (75.88-77.62) |  |
| Supplement Vit B6 | No | 93746.4 (93340.7-94152.1) | 0.960 | 1618.0 (1594.77-1641.23) | 0.316 | 673.99 (665.26-682.71) | 0.822 | 76.86 (76.04-77.69) | **0.015** |
|  | Yes | 93800 (90444.8-97155.3) |  | 1678.8 (1534.68-1822.94) |  | 669.1 (625.87-712.25) |  | 82.26 (75.16-89.35) |  |
| Supplement Vit B12 | No | 93967.5 (93385.9-94549.2) | 0.327 | 1614.00 (1579.71-1648.30) | 0.613 | 674.79 (661.96-687.62) | 0.828 | 76.80 (75.62-77.98) | 0.554 |
|  | Yes | 93558.4 (92984.9-94131.9) |  | 1625.85 (1594.87-1656.83) |  | 672.90 (661.46-684.33) |  | 77.30 (76.12-78.49) |  |
| Supplement Vit D | No | 93760.1 (93350.3-94169.9) | 0.421 | 1620.05 (1597.00-1643.09) | 0.711 | 673.67 (665.10-682.23) | 0.706 | 77.08 (76.24-77.92) | 0.715 |
|  | Yes | 91346.6 (84156.3-98536.8) |  | 1682.57 (1321.92-2043.21) |  | 696.18 (602.14-790.21) |  | 74.83 (60.55-89.11) |  |
| Supplement Ca | No | 93760.9 (93347.8-94173.9) | 0.641 | 1620.83 (1597.62-1644.04) | 0.748 | 674.18 (665.53-682.83) | 0.499 | 77.07 (76.22-77.91) | 0.959 |
|  | Yes | 92990.6 (90144.5-95836.6) |  | 1590.98 (1427.75-1754.21) |  | 651.97 (605.26-698.69) |  | 77.24 (72.60-81.88) |  |
| Supplement Fe | No | 93768.6 (93346.3-94190.8) | 0.717 | 1624.83 (1600.85-1648.81) | 0.149 | 674.59 (665.75-683.43) | 0.491 | 77.15 (76.29-78.01) | 0.477 |
|  | Yes | 934664.6 (91799.8-95129.3) |  | 1556.86 (1481.23-1632.48) |  | 662.68 (629.19-696.16) |  | 75.93 (72.31-79.55) |  |
| Supplement Mg | No | 93765.3 (93356.6-94173.9) | 0.547 | 1622.23 (1599.08-1645.38) | 0.229 | 673.94 (665.31-682.56) | 0.805 | 77.06 (76.21-77.90) | 0.824 |
|  | Yes | 92817.2 (87863.1-97771-2) |  | 1515.60 (1325.49-1705.70) |  | 666.21 (599.67-732.74) |  | 77.77 (72.00-83.55) |  |
| Supplement Zn | No | 93758.8 (93346.3-94171.2) | 0.683 | 1620.68 (1597.50-1643.85) | 0.817 | 674.24 (665.60-682.87) | 0.416 | 77.06 (76.22-77.91) | 0.886 |
|  | Yes | 93047.8 (89807.5-96288.1) |  | 1597.98 (1412.83-1783.14) |  | 646.09 (595.05-697.12) |  | 77.57 (72.35-82.79) |  |

|  |  | **Fe** | |
| --- | --- | --- | --- |
|  |  | **Mean (95%CI)** | **p** |
| **Variables** | **Categories** |  |  |
| Calories (KJ/day) | ≤2000 | 1095.13 (1061.16-1129.11) | 0.121 |
|  | >2000 | 1135.61 (1097.01-1174.21) |  |
| Proteins (g/day) | ≤99.50 | 1096.89 (1058.38-1135.40) | 0.231 |
|  | >99.50 | 1128.25 (1093.91-1162.52) |  |
| Fat (g/day) | ≤89.5 | 1103.93 81074.76-1133.07) | 0.192 |
|  | >89.5 | 1142.03 (1089.41-1194.65) |  |
| Carbohydrates (g/day) | ≤250.50 | 1095.44 (1063.20-1127.68) | 0.079 |
|  | >250.50 | 1142.01 (1100.30-1183.73) |  |
| Dairy products (g/day) | ≤455 | 1107.19 (1071.34-1143.05) | 0.535 |
|  | >455 | 1123.49 (1087.36-1159.62) |  |
| Read meat (g/day) | ≤53.50 | 1132.49 (1089.17-1175.80) | 0.306 |
|  | >53.50 | 1104.56 (1072.82-1136.31) |  |
| White meat (g/day) | ≤30.45 | 1106.07 (1071.21-1140.93) | 0.503 |
|  | >30.45 | 1123.56 (1058.81-1161.31) |  |
| Fish (g/day) | ≤71 | 1116.43 (1080.13-1152.73) | 0.868 |
|  | >71 | 1112.10 (1075.97-1148.23) |  |
| Cereals/pasta (g/day) | ≤90.5 | 1105.03 (1076.13-1133.94 ) | 0.246 |
|  | >90.5 | 1138.89 (1085.36-1192.42) |  |
| Legumes (g/day) | ≤50 | 1116.67 (1074.60-1158.73) | 0.895 |
|  | >50 | 1113.08 (1080.80-1145.36) |  |
| Potatoes (g/day) | ≤61.5 | 1114.83 (1080.16-1149.49) | 0.972 |
|  | >61.5 | 1113.91 (1076.56-1151.26) |  |
| Bread (g/day) | ≤42 | 1138.32 (1052.71-1223.92) | 0.488 |
|  | >42 | 1110.94 (1084.30-1137.58) |  |
| Supplement Vit B6 | No | 1113.96 (1088.11-1139.81) | 0.701 |
|  | Yes | 1089.18 (976.84-1201.52) |  |
| Supplement Vit B12 | No | 1147.86 (1111.32-1184.39) | 0.011 |
|  | Yes | 1082.95 (1048.37-1117.53) |  |
| Supplement Vit D | No | 1113.30 (1087.99-1138.59) | 0.750 |
|  | Yes | 1054.13 (986.87-1121.40) |  |
| Supplement Ca | No | 11112.47 (1087.05-1137.88) | 0.744 |
|  | Yes | 1145.81 (923.34-1368.29) |  |
| Supplement Fe | No | 1112.73 (1086.74-1138.71) | 0.935 |
|  | Yes | 1116.93 (1010.87-1222.98) |  |
| Supplement Mg | No | 1112.93 (1087.52-1138.35) | 0.967 |
|  | Yes | 1116.99 (895.16-1338.81) |  |
| Supplement Zn | No | 1112.42 (1087.05-1137.80) | 0.709 |
|  | Yes | 1152.6 (899.6-1405.5) |  |

| **Valencia** |  | **Ca** | | **Cu** | | **Zn** | | **Se** | |
| --- | --- | --- | --- | --- | --- | --- | --- | --- | --- |
|  |  | **Mean (95%CI)** | **p** | **Mean (95%CI)** | **p** | **Mean (95%CI)** | **p** | **Mean (95%CI)** | **p** |
| **Variables** | **Categories** |  |  |  |  |  |  |  |  |
| Calories (KJ/day) | ≤2000 | 94249.5 (93825.1-94673.9) | 0.780 | 1617.12 (1579.65-1654.59) | 0.677 | 607.34 (590.60-624.07) | 0.310 | 81.98 (80.95-83.01) | 0.926 |
|  | >2000 | 94325.7 (94025.9-94625.6) |  | 1607.52 (1582.65-1632.38 |  | 617.08 (607.00-627.16) |  | 81.92 (81.16-82.67) |  |
| Proteins (g/day) | ≤99.50 | 94246.2 (93769.5-94722.9) | 0.771 | 1593.67 (1554.18-1633.17) | 0.310 | 603.43 (588.91-617.95) | 0.117 | 81.99 (80.90-83.07) | 0.920 |
|  | >99.50 | 94326.3 (94040.3-94612-2) |  | 1617.21 (1592.91-1641.52) |  | 618.58 (607.94-629.22) |  | 81.91 (81.18-82.66) |  |
| Fat (g/day) | ≤89.5 | 94395.5 (94028.1-94762.9) | 0.519 | 1634.30 (1603.77-1664.84) | 0.048 | 610.42 (597.59-623.26) | 0.459 | 82.18 (81.24-83.12) | 0.499 |
|  | >89.5 | 94232.8 (939003-94562-6) |  | 1592.21 (1564.22-1620.21) |  | 617.00 (605.29-628.71) |  | 81.75 (80.95-82.56) |  |
| Carbohydrates (g/day) | ≤250.50 | 94268.3 (93903.5-94633.1) | 0.782 | 1623.16 (1593.44-1652.89) | 0.228 | 612.86 (600.54-625.18) | 0.772 | 82.40 (81.57-83.23) | 0.142 |
|  | >250.50 | 94337.3 (94007.7-94666.8) |  | 1597.79 (1568.96-1626.62) |  | 615.41 (603.23-627.60) |  | 81.48 (80.59-82.38) |  |
| Dairy products (g/day) | ≤455 | 94218.5 (93857.4-94579.6) | 0.489 | 1613.01 (1584.50-1641.52) | 0.799 | 619.43 (606.42-632.45) | 0.221 | 82.42 (81.58-83.25) | 0.116 |
|  | >455 | 94391 (94059.6-94722.4) |  | 1607.64 (1577.50-1637.78) |  | 608.67 (597.33-619.99) |  | 81.44 (80.54-82.24) |  |
| Red meat (g/day) | ≤53.50 | 94347.1 (93903.1-94791.2) | 0.824 | 1627.80 (1590.99-1664.61) | 0.297 | 621.34 (602.47-640.21) | 0.307 | 82.17 (81.01-83.34) | 0.637 |
|  | >53.50 | 94285.5 (93991.2-94579.9) |  | 1603.46 (1578.50-1628.42) |  | 611.34 (601.82-620.87) |  | 81.84 (81.13-82.56) |  |
| White meat (g/day) | ≤30.45 | 94050.0 (93675.9-94424.1) | 0.135 | 1591.78 (1556.00-1627.55) | 0.193 | 613.13 (598.95-627.30) | 0.862 | 81.71 (80.67-82.74) | 0.582 |
|  | >30.45 | 94440.3 (94121.3-94759.4) |  | 1620.48 (1595.12-1645.83) |  | 614.72 (603.79-625.66) |  | 82.06 (81.30-82.82) |  |
| Fish (g/day) | ≤71 | 94227.9 (93929.2-94526.5) | 0.475 | 1610.24 (1583.66-1636.82) | 0.987 | 609.79 (599.02-620.57) | 0.235 | 81.38 (80.60-82.16) | **0.032** |
|  | >71 | 94409.1 (93993.3-94824.9) |  | 1610.58 (1577.56-1643.60) |  | 620.41 (606.10-634.73) |  | 82.73 (81.75-83.70) |  |
| Cereals / pasta (g/day) | ≤90.5 | 94148.9 (93779.5-94518.3) | 0.285 | 1617.38 (1584.25-1650.51) | 0.565 | 612.64 (599.71-625.57) | 0.765 | 82.51 (81.63-83.40) | 0.109 |
|  | >90.5 | 94418.6 (94090.5-94746.8) |  | 1605.13 (1578.72-1631.54) |  | 615.30 (603.64-626.96) |  | 81.50 (80.67-82.35) |  |
| Legumes (g/day) | ≤50 | 94356.8 (94057.2-94656.5) | 0.644 | 1603.58 (1574.64-1632.53) | 0.492 | 614.40 (602.21-626.59) | 0.952 | 81.76 (80.98-82.54) | 0.545 |
|  | >50 | 94241 (93842.9-94641.0) |  | 1618.09 (1588.47-1647.71) |  | 613.86 (601.63-626.10) |  | 82.14 (81.18-83.10) |  |
| Bread (g/day) | ≤42 | 94304.1 (94025.9-94582.4) | 0.987 | 1616.04 (1592.51-1639.57) | 0.339 | 610.94 (601.34-620.55) | 0.198 | 81.83 (81.14-82.51) | 0.525 |
|  | >42 | 94299.5 (93778.6-94820.4) |  | 1592.42 (1548.89-1635.95) |  | 624.17 (604.85-643.48) |  | 82.29 (80.93-83.65) |  |
| Supplement Vit B6 | No | 94160.7 (93812.3-94509.2) | 0.330 | 1609.4 (1578.85-1639.89) | 0.984 | 605.48 (593.81-617.14) | 0.085 | 80.96 (80.01-81.92) | **0.005** |
|  | Yes | 94405 (94064.2-94745.8) |  | 1609.8 (1581.94-1637.68) |  | 620.68 (608.23-633.13) |  | 82.70 (81.92-83.48) |  |
| Supplement Vit B12 | No | 94231.3 (93394.0-95068.5) | 0.860 | 1623.45 (1552.69-1694.21) | 0.661 | 583.03 (560.62-605.44) | 0.019 | 80.69 (78.82-82.56) | 0.182 |
|  | Yes | 94304.7 (94048.7-94560.6) |  | 1608.09 (1586.60-1629.59) |  | 617.27 (608.04-626.50) |  | 82.07 (81.43-82.71) |  |
| Supplement Vit D | No | 94042.9 (93728.0-94357.8) | **0.033** | 1604.93 (1576.86-1633.01) | 0.640 | 607.36 (596.76-617.96) | 0.120 | 80.88 (80.06-81.71) | **<0.001** |
|  | Yes | 94574.5 (94197.1-94952) |  | 1614.72 (1584.48-1644.51) |  | 621.04 (607.12-634.95) |  | 83.08 (82.20-83.97) |  |
| Supplement Ca | No | 94107.6 (93767.1-94448.0) | 0.159 | 1603.11 (1573.45-1632.77) | 0.566 | 605.09 (593.78-616.41) | 0.060 | 80.77 (79.87-81.67) | **<0.001** |
|  | Yes | 94459.3 (94111.4-94807.3) |  | 1615.17 (1586.62-1643.71) |  | 621.61 (608.80-634.43) |  | 82.93 (82.12-83.74) |  |
| Supplement Fe | No | 94211.5 (93835.6-94587.4) | 0.554 | 1604.84 (1572.41-1637.27) | 0.699 | 608.20 (595.58-620.83) | 0.263 | 80.82 (79.86-81.79) | **0.004** |
|  | Yes | 94362.8 (940441.3-94684.2) |  | 1613.16 (1586.50-1639.82) |  | 618.23 (606.61-629.84) |  | 82.66 (81.88-83.44) |  |
| Supplement Mg | No | 94181.4 (93833.5-94529.3) | 0.406 | 1608.85 (1578.48-1639.23) | 0.948 | 605.78 (594.17-617.40) | 0.095 | 80.99 (80.04-81.93) | **0.006** |
|  | Yes | 94389.9 (94048.3-94731.5) |  | 1610.22 (1582.25-1638.20) |  | 620.52 (608.01-633.02) |  | 82.69 (81.91-83.47) |  |
| Supplement Zn | No | 94160.7 (93812.3-94509.2) | 0.330 | 1609.37 (1578.85-1639.89) | 0.984 | 605.48 (593.81-617.14) | 0.085 | 80.96 (80.01-81.92) | **0.005** |
|  | Yes | 94405.0 (94064.2-94745.8) |  | 1609.81 (1581.94-1637.67) |  | 620.68 (608.23-633.13) |  | 82.70 (81.92-83.48) |  |

|  |  | **Fe** | | **Mg** | |
| --- | --- | --- | --- | --- | --- |
|  |  | **Mean (95%CI)** | **p** | **Mean (95%CI)** | **p** |
| **Variables** | **Categories** |  |  |  |  |
| Calories (KJ/day) | ≤2000 | 1099.56 (1054.24-1144.88) | 0.450 | 17119.11 (16977.96-17260.26) | 0.156 |
|  | >2000 | 1121.05 (1090.08-1152.03) |  | 16996.69 (16904.04-17089.35) |  |
| Proteins (g/day) | ≤99.50 | 1121.52 (1074.71-1168.33) | 0.735 | 17095.10 (16964.00-17226.20) | 0.289 |
|  | >99.50 | 1111.82 (1081.24-1142.40) |  | 17007.84 (16912.71-17102.97) |  |
| Fat (g/day) | ≤89.5 | 1099.69 (1061.52-1137.87) | 0.316 | 17117.35 (17004.78-17229.92) | 0.063 |
|  | >89.5 | 1126.02 (1091.57-1160.47) |  | 16969.24 (16863.31-17075.18) |  |
| Carbohydrates (g/day) | ≤250.50 | 1105.78 (1072.07-1139.49) | 0.500 | 17119.30 (17011.68-17226.92) | **0.030** |
|  | >250.50 | 1123.34 (1084.89-1161.79) |  | 16948.35 (16837.42-17059.29) |  |
| Dairy products (g/day) | ≤455 | 1130.29 (1095.87-1164.72) | 0.219 | 17015.57 (16909.58-17121.55) | 0.649 |
|  | >455 | 1098.30 (1060.32-1136.27) |  | 17051.50 (16937.95-17165.04) |  |
| Red meat (g/day) | ≤53.50 | 1130.01 (1082.46-1177.56) | 0.457 | 17094.83 (16962.06-17227.60) | 0.299 |
|  | >53.50 | 1108.53 (1078.15-1138.90) |  | 17008.70 (16914.12-17103.27) |  |
| White meat (g/day) | ≤30.45 | 1110.10 (1068.28-1151.92) | 0.798 | 17053.89 (16928.93-17178.83) | 0.699 |
|  | >30.45 | 1117.09 (1084.77-1149.42) |  | 17021.93 (16923.34-17120.52) |  |
| Fish (g/day) | ≤71 | 1113.71 (1081.37-1146.04) | 0.932 | 17035.87 (16938.47-17133.27) | 0.935 |
|  | >71 | 1115.96 (1074.34-1157.58) |  | 17029.37 (16902.45-17156.28) |  |
| Cereals / pasta (g/day) | ≤90.5 | 1110.92 (1070.77-1151.07) | 0.805 | 17087.52 (16969.09-17205.95) | 0.233 |
|  | >90.5 | 1117.42 (1084.23-1150.62) |  | 16992.41 (16889.92-17094.90) |  |
| Legumes (g/day) | ≤50 | 1116.93 (1080.85-1153.01) | 0.852 | 17118.91 (17017.08-17220.74) | **0.020** |
|  | >50 | 1112.05 (1075.82-1148.29) |  | 16935.91 (16818.22-17053.61) |  |
| Bread (g/day) | ≤42 | 1110.08 (1080.63-1139.53) | 0.533 | 17074.37 (16984.90-17163.84) | 0.063 |
|  | >42 | 1129.08 (1077.30-1180.86) |  | 16902.46 (16748.69-17056.22) |  |
| Supplement Vit B6 | No | 1111.59 (1073.64-1149.54) | 0.822 | 16969.78 (16844.17-17095.39) | 0.157 |
|  | Yes | 1117.45 (1083.02-1151.89) |  | 17081.81 (16985.48-17178.15) |  |
| Supplement Vit B12 | No | 1167.00 (1093.38-1240.63) | 0.182 | 17029.83 (16744.35-17315.31) | 0.982 |
|  | Yes | 1109.13 (1082.04-1136.21) |  | 17032.74 (16952.75-17112.74) |  |
| Supplement Vit D | No | 1115.91 (1080.37-1151.45) | 0.934 | 16971.22 (16858.15-17084.29) | 0.104 |
|  | Yes | 1113.76 (1077.11-1150.40) |  | 17099.15 (16995.01-17203.29) |  |
| Supplement Ca | No | 1117.68 (1080.43-1154.93 ) | 0.843 | 16955.67 (16832.42-17078.91) | 0.075 |
|  | Yes | 1112.50 (1077.51-1147.50) |  | 17097.96 (17001.03-17194.89) |  |
| Supplement Fe | No | 1122.75 (1082.54-1162.95) | 0.625 | 16944.93 (16808.37-17081.50) | 0.085 |
|  | Yes | 1109.72 (1076.68-1142.77) |  | 17089.08 (16997.12-17181.03) |  |
| Supplement Mg | No | 1111.51 (1073.83-1149.20) | 0.818 | 16969.36 (16844.31-17094.41) | 0.158 |
|  | Yes | 1117.54 (1082.91-1152.17) |  | 17802.76 (16986.15-17179.37) |  |
| Supplement Zn | No | 1111.59 (1073.63-1149.54) | 0.822 | 16969.77 (16844.16-17095.39) | 0.164 |
|  | Yes | 1117.45 (1083.01-1151.89) |  | 17081.81 (16985.48-17178.15) |  |
