# Supplementary material
Source: Elsevier journal article supplement (https://www.sciencedirect.com/science/article/pii/S021391112100159X)
Supplement: mmc2 [file S021391112100159X:mmc2.doc]

**Appendix 2**

- **NHANES (**[**https://www.cdc.gov/exposurereport/index.html**](https://www.cdc.gov/exposurereport/index.html)**)**
- **EFSA (**[**https://www.efsa.europa.eu/en/topics/topic/metals-contaminants-food**](https://www.efsa.europa.eu/en/topics/topic/metals-contaminants-food)**)**
- **U.S. EPA (**[**https://www.epa.gov/caddis-vol2/metals**](https://www.epa.gov/caddis-vol2/metals)**)**
- **Ministerio de Agricultura, Pesca y Alimentación (**[**https://www.mapa.gob.es/es/alimentacion/temas/default.aspx**](https://www.mapa.gob.es/es/alimentacion/temas/default.aspx)**)**
- **Agencia Española de Seguridad española y Nutrición (**[**http://www.aesan.gob.es/AECOSAN/web/seguridad_alimentaria/subdetalle/metales_pesados.htm**](http://www.aesan.gob.es/AECOSAN/web/seguridad_alimentaria/subdetalle/metales_pesados.htm)**)**
